# Supplementary material for: Parallel [TG(GA)3]n-homoduplexes/thioflavin T: an intense and stable fluorescent indicator for label-free biosensing
Source: Royal Society of Chemistry journal article supplement (doi:10.1039/c9an01856e), 2019-11-11
Supplement: c9an01856e1.pdf [file c9an01856e1.pdf]

## **Parallel [TG(GA)<sub>3</sub>]<sub>n</sub>-homoduplexes/thioflavin T: An intense and stable fluorescent indicator for label-free biosensing**

Qiang Liu,<sup>a</sup> Shaochun Jing,<sup>a</sup> Mei Liu,<sup>b</sup> Yan Jin,<sup>a</sup> Baoxin Li<sup>a\*</sup>

*<sup>a</sup>School of Chemistry & Chemical Engineering, Key laboratory of Analytical Chemistry for Life Science of Shaanxi Province, Shaanxi Normal University, Xi'an 710062, China*

*<sup>b</sup>College of Food Engineering and Nutritional Science, Shaanxi Normal University, Xi'an 710062, China*

\*Fax: +86-29-81530727. E-mail: [libaoxin@snnu.edu.cn](mailto:libaoxin@snnu.edu.cn) (B. Li)

**Table S1** Sequence of the used oligonucleotides

| <b>Name</b>                               | <b>Sequence (5'-3')</b>                                  |
|-------------------------------------------|----------------------------------------------------------|
| (GA) <sub>10</sub>                        | GA                         |
| (GA) <sub>10</sub> TG                     | GA TG                      |
| (GA) <sub>10</sub> TGTG                   | GA TGTG                    |
| TG(GA) <sub>10</sub>                      | TG GA                      |
| TGTG(GA) <sub>10</sub>                    | TGTG GA                    |
| TG(GA) <sub>10</sub> GT                   | TGGA GA GT                    |
| TG(GA) <sub>10</sub> TG                   | TGGA GA TG                    |
| [TG(GA) <sub>5</sub> ] <sub>2</sub>       | TG GAGAGAGAGA TG GAGAGAGAGA                              |
| (GA) <sub>5</sub>                         | GAGAGAGAGA                                               |
| (GA) <sub>5</sub> TG                      | GAGAGAGAGA TG                                            |
| TG(GA) <sub>5</sub>                       | TG GAGAGAGAGA                                            |
| TG(GA) <sub>5</sub> TG                    | TG GAGAGAGAGA TG                                         |
| [(GA) <sub>5</sub> TG] <sub>2</sub>       | GAGAGAGAGA TG GAGAGAGAGA TG                              |
| [(GA) <sub>5</sub> TG] <sub>2</sub> TG    | GAGAGAGAGA TG GAGAGAGAGA TG TG                           |
| TG[GA] <sub>2</sub> TG[GA] <sub>2</sub>   | TG GAGA TG GAGA                                          |
| TG[GA] <sub>3</sub> TG[GA] <sub>3</sub>   | TG GAGAGA TG GAGAGA                                      |
| TG[GA] <sub>4</sub> TG[GA] <sub>4</sub>   | TG GAGAGAGA TG GAGAGAGA                                  |
| TG[GA] <sub>5</sub> TG[GA] <sub>5</sub>   | TG GAGAGAGAGA TG GAGAGAGAGA                              |
| TG[GA] <sub>6</sub> TG[GA] <sub>6</sub>   | TG GAGAGAGAGAGA TG GAGAGAGAGAGA                          |
| TG[GA] <sub>7</sub> TG[GA] <sub>7</sub>   | TG GAGAGAGAGAGAGA TG GAGAGAGAGAGAGA                      |
| TG[GA] <sub>8</sub> TG[GA] <sub>8</sub>   | TG GAGAGAGAGAGAGAGA TGGAGAGAGAGAGAGAGA                   |
| TG[GA] <sub>9</sub> TG[GA] <sub>9</sub>   | TG GAGAGAGAGAGAGAGAGA TG GAGAGAGAGAGAGAGAGA              |
| TG[GA] <sub>10</sub> TG[GA] <sub>10</sub> | TG GAGAGAGAGAGAGAGAGAGA TG GAGAGAGAGAGAGAGAGAGA          |
| [TG(GA) <sub>3</sub> ] <sub>2</sub>       | TGGAGAGA TGGAGAGA                                        |
| [TG(GA) <sub>3</sub> ] <sub>3</sub>       | TGGAGAGA TGGAGAGA TGGAGAGA                               |
| [TG(GA) <sub>3</sub> ] <sub>4</sub>       | TGGAGAGA TGGAGAGA TGGAGAGA TGGAGAGA                      |
| [TG(GA) <sub>3</sub> ] <sub>5</sub>       | TGGAGAGA TGGAGAGA TGGAGAGA TGGAGAGA TGGAGAGA             |
| [TG(GA) <sub>3</sub> ] <sub>6</sub>       | TGGAGAGA TGGAGAGA TGGAGAGA TGGAGAGA TGGAGAGA<br>TGGAGAGA |

|                                       |                                                                        |
|---------------------------------------|------------------------------------------------------------------------|
| C-[TG(GA) <sub>3</sub> ] <sub>3</sub> | TCT CTC CAT CTC TCC ATC TCT CCA                                        |
| G4                                    | AGGG TTAGGG TTAGGG TTAGGG TTAGGG                                       |
| miRNA-21                              | UAG CUU AUC AGA CUG AUG UUG A                                          |
| ps-Template                           | TCTCTCCATCTCTCCATCTCTCCATCTTGACTCTCAACATCAGTC<br>TGATAAGCTA-phosphate  |
| G4-Template                           | CCCTAACCCCTAACCCCTAACCCCTTCTTGACTCTCAACATCAGTCT<br>GATAAGCTA-phosphate |

---

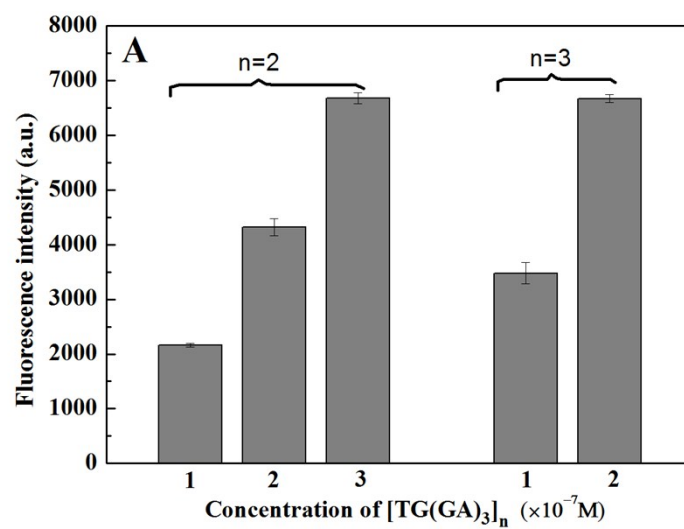

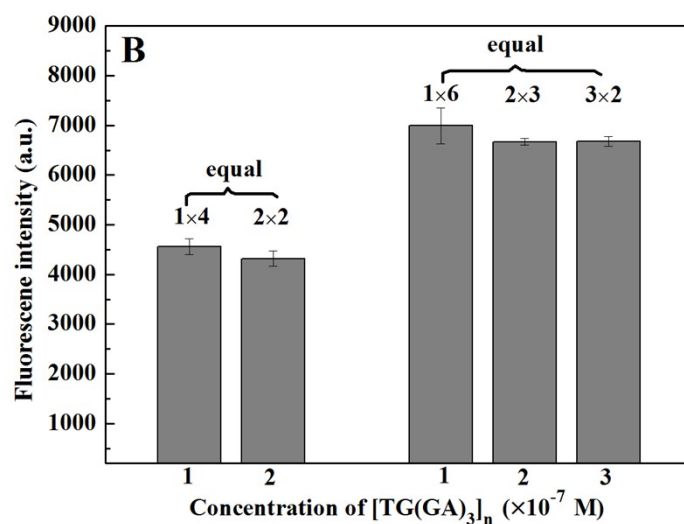

**Figure S1.** (A) The fluorescence intensity variation of  $[\text{TG}(\text{GA})_3]_n/\text{ThT}$  with the increasing concentration of  $[\text{TG}(\text{GA})_3]_n$ ; (B) Comparison of the fluorescence intensity of  $[\text{TG}(\text{GA})_3]_n/\text{ThT}$  when  $C \times n$  (where  $C$  is the concentration of  $[\text{TG}(\text{GA})_3]_n$ , and  $n$  is the number of  $\text{TG}(\text{GA})_3$  motifs) is equal.

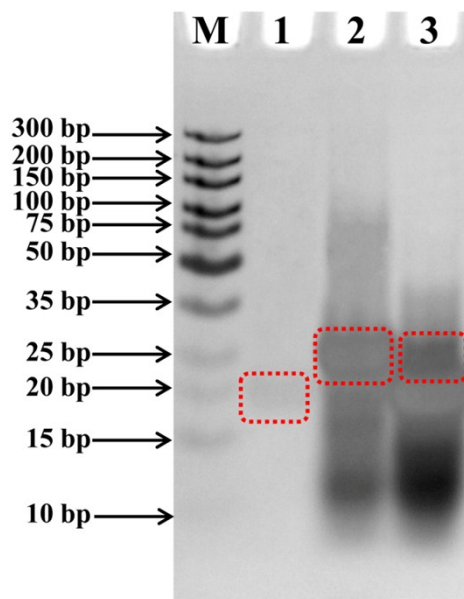

**Figure S2** Polyacrylamide gel electrophoresis verification of the structure of parallel  $[\text{TG}(\text{GA})_3]_3$  homoduplex in 5 mM Tris-HCl (7.4), 20 mM  $\text{Mg}^{2+}$  buffer. Lane M: Marker; Lane 1: C- $[\text{TG}(\text{GA})_3]_3$ ; Lane 2: The mixture of C- $[\text{TG}(\text{GA})_3]_3$  and  $[\text{TG}(\text{GA})_3]_3$ ; Lane 3 :  $[\text{TG}(\text{GA})_3]_3$ .

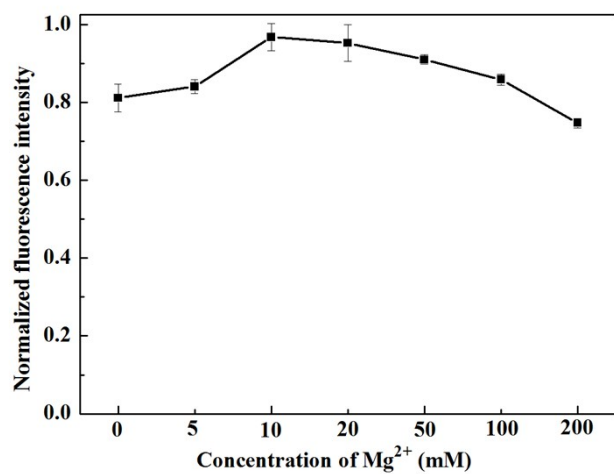

**Figure S3** The fluorescence intensity change of [TG(GA)<sub>3</sub>]<sub>3</sub>/ThT with the increase concentration of Mg<sup>2+</sup>. Experimental condition: 100 nM DNA strands, 20 μM ThT in 5 mM Tris-HCl (pH=7.4).

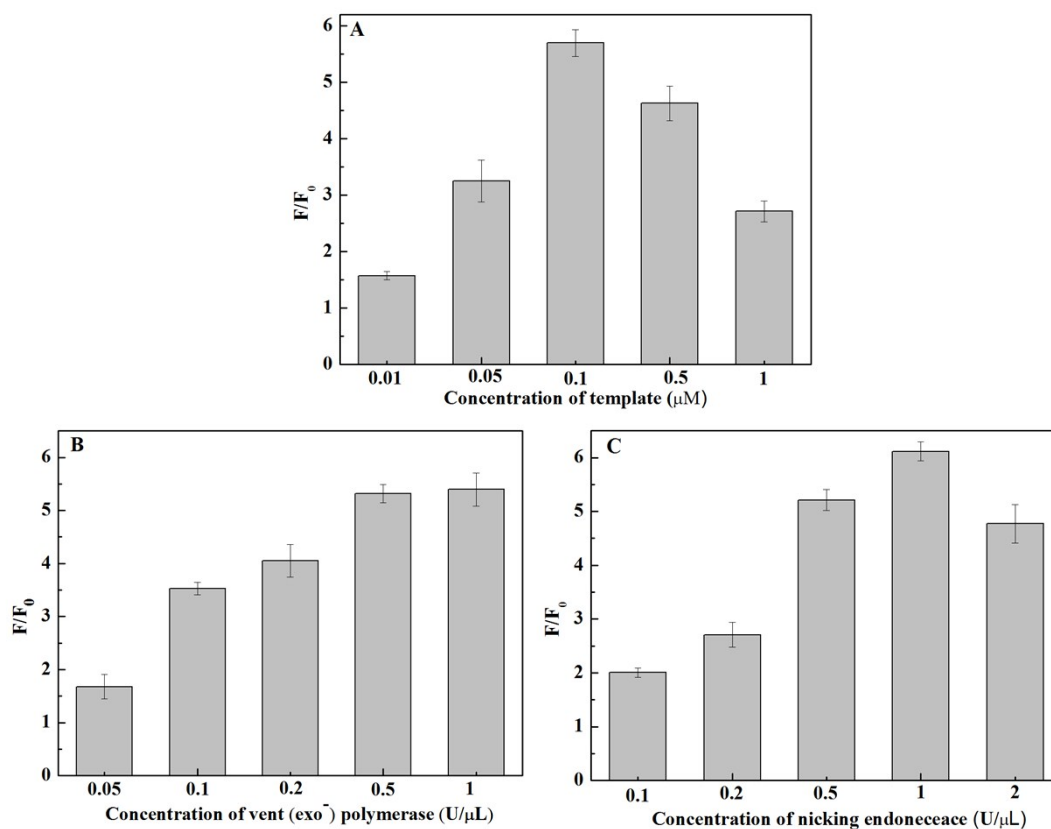

**Figure S4.** Effects of EXPAR reaction conditions on the sensitivity of  $[\text{TG}(\text{GA})_3]_3$  system: (A) concentration of template, (B) amount of Vent (exo-) polymerase, (C) amount of Nt.BstNBI.

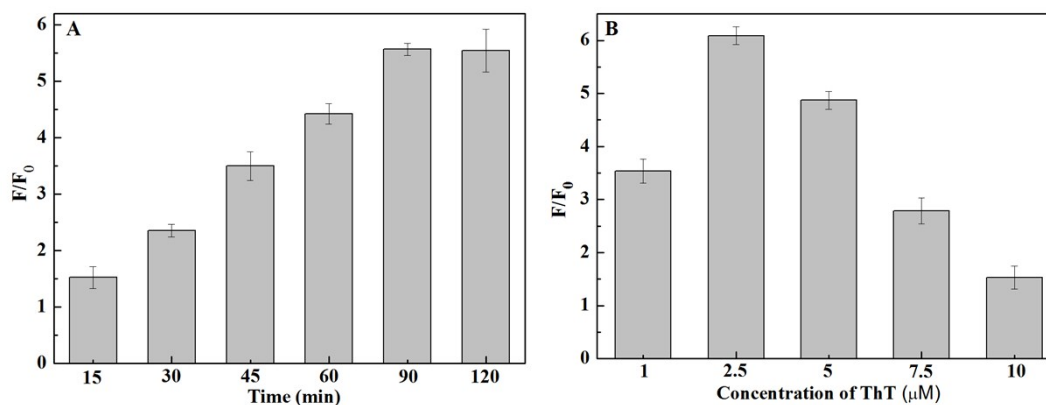

**Figure S5.** Effects of time (A) and ThT concentration (B) on the sensitivity of  $[\text{TG}(\text{GA})_3]_3/\text{ThT-EXPAR}$  system.

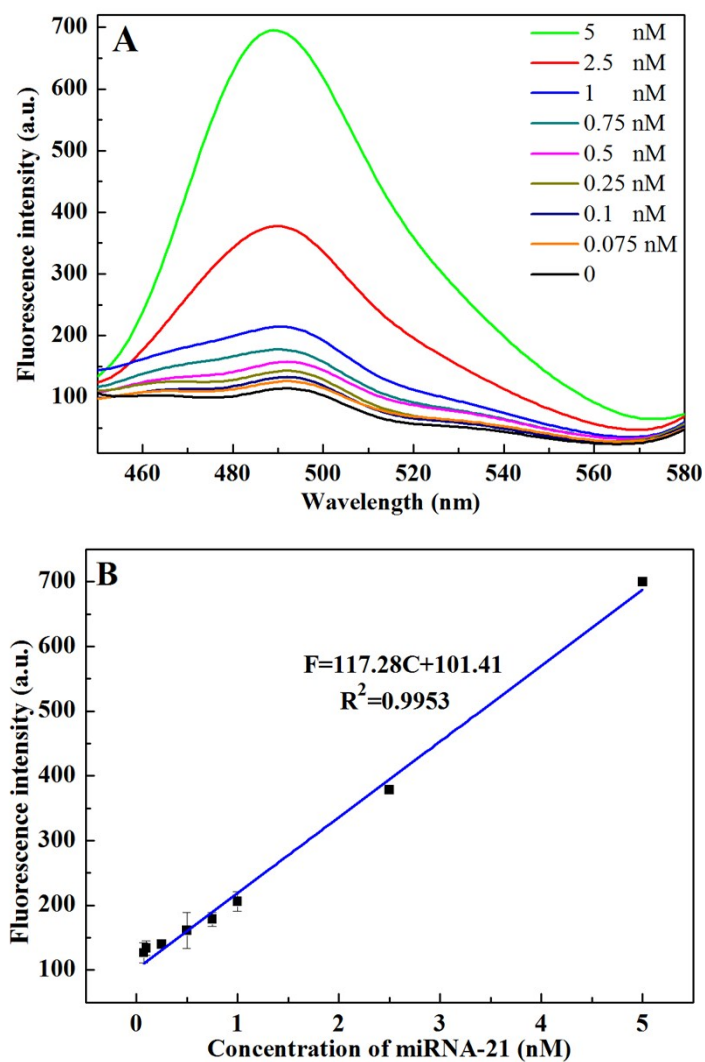

**Figure S6.** (A) Fluorescence spectra of the  $[TG(GA)_3]_3/ThT-EXPAR$  strategy system in the presence of miRNA-21 with concentrations from 0 to 5 nM; (B) The calibration curve between fluorescence intensity at 490 nm and miRNA-21 concentrations.



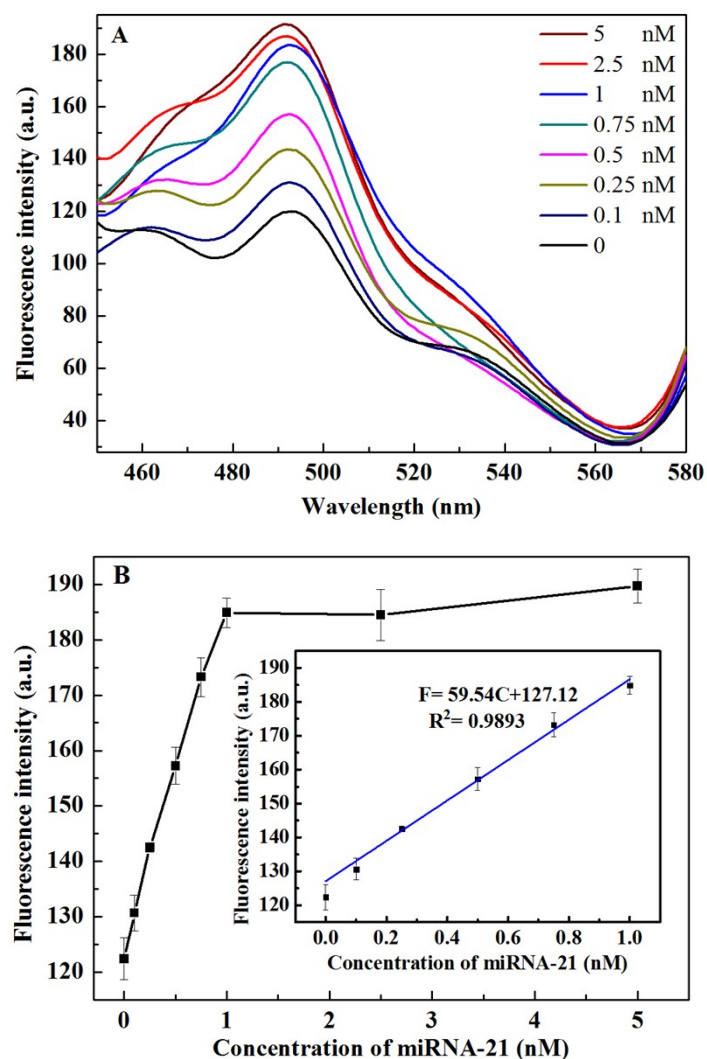

**Figure S7.** (A) Fluorescence emission spectra of G<sub>4</sub>/ThT-EXPAR strategy in the presence of miRNA-21 concentrations from 0 to 5 nM; (B) The calibration curve between fluorescence intensity and the concentration of miRNA.
